# Supplementary material for: Admission avoidance in tonsillitis and peritonsillar abscess: A prospective national audit during the initial peak of the COVID‐19 pandemic
Source: PubMed Central journal article supplement — Clin Otolaryngol. 2020 Dec 17;46(2):363–72. doi: 10.1111/coa.13680 (PMC7753410; doi:10.1111/coa.13680), 2020-12-17
Supplement: COA-46-363-s001.pdf [file COA-46-363-s001.pdf]

# Second Interim report

overall

2,299 emergency cases managed by ENT

73 centres

1,590 epistaxis cases

13.1% epistaxis being given IV tranexamic acid (down from 17.6%)

9 weeks prospective data collection period

51.2% epistaxis ending up with a non-dissolvable pack after ENT review

Period 1: 6<sup>th</sup> April to 3<sup>rd</sup> May  
 Period 2: 4<sup>th</sup> May to 31<sup>st</sup> May  
 Period 3: 1<sup>st</sup> June to 28<sup>th</sup> June

709 suspected tonsillitis/quinsies cases

23.2% suspected quinsies NOT drained (down from 31.3%)

84.7% non-dissolvable Packs were Rapid Rhinos

61.2% epistaxis had NO cauterisation attempted

88.2% T/Q having an oral examination (up from 84.3%)

presentation

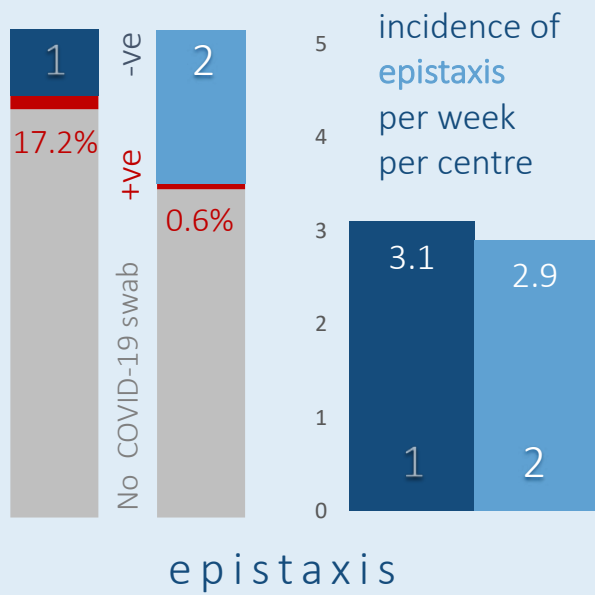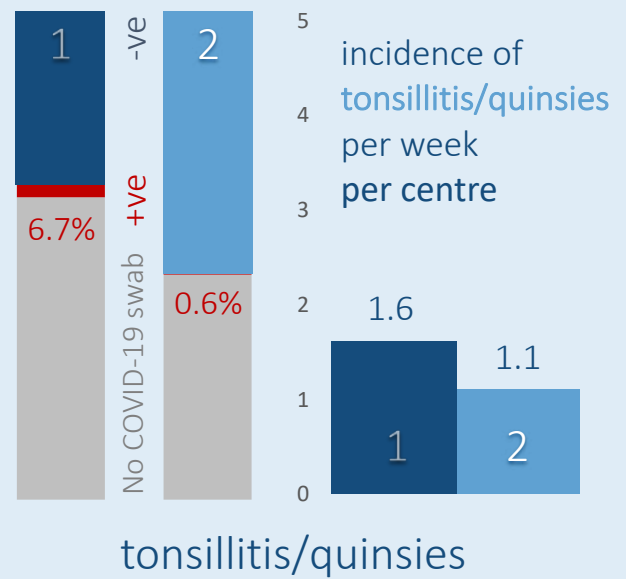

# INTEGRATE

The UK ENT Trainee Research Network

discharge

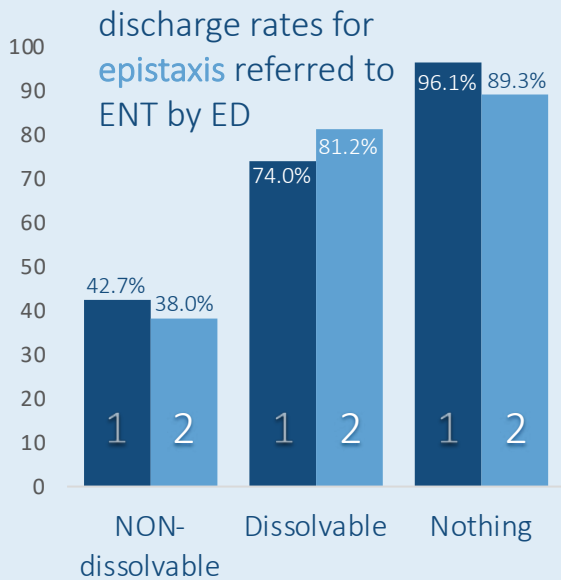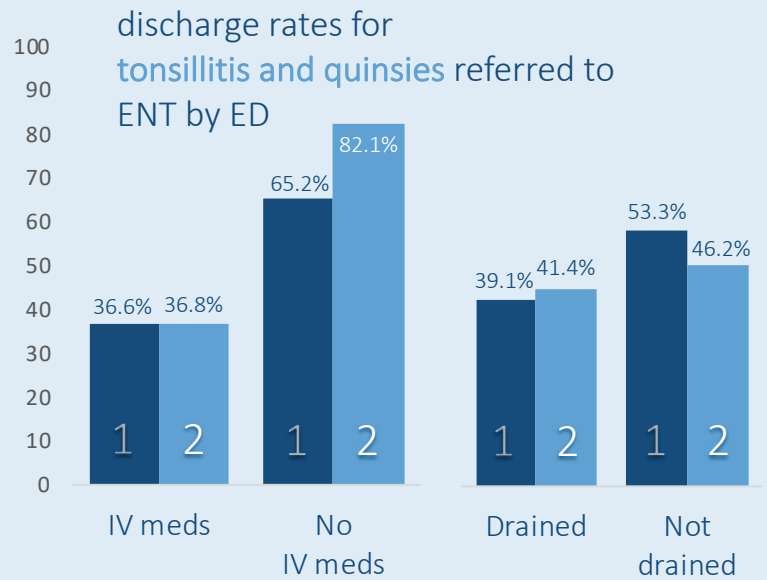

outcomes

10-day re-presentation rate for epistaxis discharged from ED by ENT

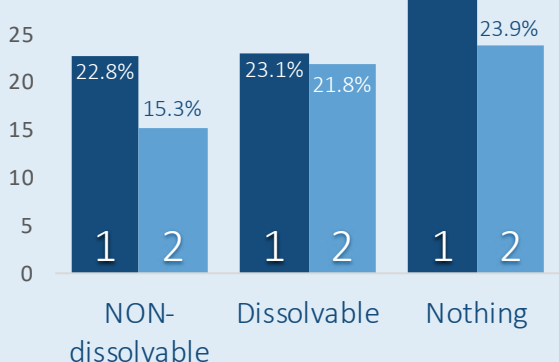

10-day re-presentation rate for tonsillitis and quinsies discharged from ED by ENT

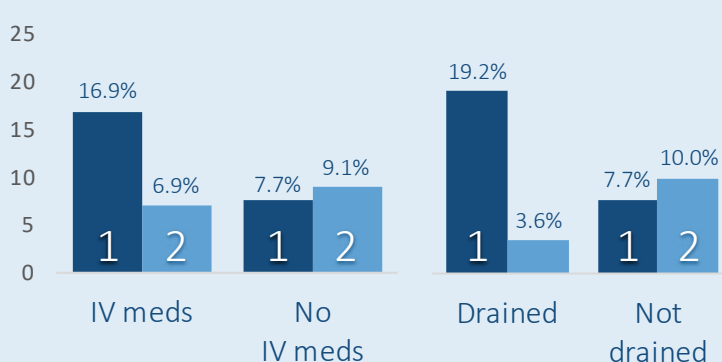

# INTEGRATE COVID-19 Emergency Care Audit

Second Interim report: 9<sup>th</sup> June 2020

<https://entintegrate.co.uk>

**Disclaimer:** The data and analyses presented in this report have not undergone peer review. The audit is ongoing and cases are still being added and updated in the local units. As such, the data and analysis presented in the final report may differ from those presented herein.

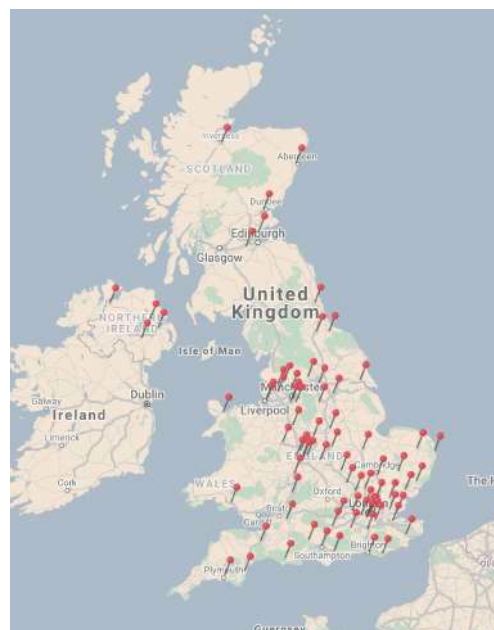

**Steering committee:** John Hardman, Matthew Smith, Chloe Swords, Huw Jones, Abi Walker, Rajeev Mathew, Ollie McLaren, Kris Hutson, John Rocke, Kristijonas Milinis, Anna Slovick, James Bryan

**Consultant Leads and Site Leads:** Aberdeen Royal Infirmary (Muhammad Shakeel, Anas Gomati);Addenbrooke's Hospital, Cambridge (Manohar Bance, James Bryan);Aintree University Hospital (Jeffrey Lancaster, Natalie Maple);Altnagelvin Area Hospital (Catherine Smyth, Colm Dorris);Antrim Area Hospital (Andrew Kelly, David McCrory);Barnet Hospital, London (Yogesh Bhatt, Guled Jama);Basildon University Hospital (Montio Morgan, Victoria Perkins);Basingstoke and North Hampshire Hospital (Paul Spraggs, Shivun Khosla);Birmingham City Hospital (Yohanna Takwoingi, Srinish Gopala-Krishnan);Bradford Royal Infirmary (BRI) (David Strachan, Eugene Omakobia);Broomfield Hospital, Chelmsford (Mark Puvanendran, Tharsika Myuran);Chorley and South Ribble Hospital (Arun Cardozo, Bhargavi Chandrasekar);Colchester General Hospital (Duncan McRae, Omar Burgan);Craigavon Area Hospital (Ekambar Reddy, Brendan Wright);Darlington Memorial Hospital (Naveed Kara, Ashleigh Ivy);Derriford Hospital, Plymouth (Richard Williams, Alex Walkden);Doncaster Royal Infirmary (Muhamad Quraishi, Nicola Stobbs);East Surrey Hospital, Redhill (Sameer Khemani, Alison Liu);Eastbourne District General Hospital (Paul Kirkland, Rishi Vasanthan);Fairfield General Hospital, Greater Manchester (Mohammed Miah, Kristina Lee);Freeman Hospital, Newcastle (Claire McLaren, Mark R Williams);Gloucestershire Royal Hospital (Okechukwu Okonkwo, Zahir Mughal);Guy's Hospital (Yakubu Karagama, Carol Xie);Heartlands Hospital, Birmingham (Mriganka De, Aakash Amlani);Ipswich Hospital (Sachin Patil, Chloe Swords);James Paget University Hospital, Great Yarmouth (Carl Philpott, Sheneen Meghji);Leicester Royal Infirmary (Sudip Das, Simon Cole);Lister Hospital, Stevenage (Ananth Vijendren, Munira Ally);Luton and Dunstable University Hospital (Prasad Kothari, Eyal Schechter);Manchester Royal Infirmary (MRI) (Baskaran Ranganathan, Rajeev Advani);Medway Maritime Hospital, Gillingham (Shamim Toma, Shamim Toma);Milton Keynes University Hospital (Adam Shakir, Darren Yap);Musgrove Park Hospital, Taunton (Edward Chisholm, Shilpa Ojha);Ninewells Hospital, Dundee (Patrick Spielmann, Richard Steven);Northampton General Hospital (Mrinal Supriya, Elizabeth Mathew);Peterborough City Hospital (Ajmal Masood, Samuel Dewhurst);Pinderfields Hospital, Wakefield (Miss Victoria Ward, Thomas Haigh);Princess Alexandra Hospital, Harlow (Shalini Patiar, Zsofia Nemeth);Princess Royal University Hospital, Orpington (Roland Terry, Rohan Vitlani);Princess Royal, Telford (Duncan Bowyer, Ding Yang);Queen Elizabeth Hospital Birmingham (Peter Monksfield, Jameel Muzaffar);Queen's Hospital Burton (Azher Siddiq, Josh Whittaker);Queen's Medical Centre, Nottingham (QMC) (Yujay Ramakrishnan, Nilesh Vakharia);Raigmore Hospital, Inverness (Angus Cain, Fergus Cooper);Royal Albert Edward Infirmary, Wigan (Steve Izzat, Elliot Heward);Royal Berkshire Hospital, Reading (Dilip Nair, Elizabeth Casselden);Royal Blackburn Hospital (Anu Daudia, Jennifer Gilchrist);Royal Glamorgan Hospital, South Wales (Vijay Singh, Emma Hallett);Royal Hallamshire Hospital, Sheffield (Jaydip Ray, Beverley Yu);Royal Preston Hospital (John DeCarpentier, Bhargavi Chandrasekar);Royal Stoke University Hospital (Sanjiv Bhimrao, Michael Eastwood);Royal Surrey County Hospital, Guildford (San Sunkaraneni, Chang Woo Lee);Royal United Hospital, Bath (Thomas Mawby, Fenella Shelton);Russells Hall Hospital, Dudley (Mudit Jindal, Alexander Yao);Salisbury District Hospital (Marcel Geyer, Emily Lowe);Southampton General Hospital (Huw Jones, Aria Amir Ghasemi);Southend University Hospital (Aaron Trinidad, Alistair Hardy);St George's Hospital, London (Sarah Little, Tiffany Munroe-Gray);St John's Hospital, Livingston (Alex Bennett, Lucy Li);Stepping Hill Hospital, Greater Manchester (Mamoona Khalid-Raja, George McNally);The James Cook University Hospital, Middlesbrough (George Thomas, Mohamed Elmorsy);The Royal Liverpool University Hospital (Clare Williams, Matthew Zammit);The Royal London Hospital (Kay Seymour, Elinor Warner);Torbay Hospital (Chris Potter, Rachel Easto);University College London Hospital (Azhar Shaida, Cillian Forde);University Hospital Coventry and Warwickshire (UHCW) (Dheeraj Karamchandani, Charn Gill);University Hospital Lewisham, London (Irfan Syed, Abigail Walker);Victoria Hospital, Five (David Walker, Kirsten Stewart);Walsall Manor Hospital (Mark Simmons, Ahmad K. Abou-Foul);West Middlesex University Hospital, London (John Almeyda, Agamemnon Pericleous);West Suffolk Hospital, Bury St Edmunds (Fahmy Fahmy, Anna Kaleva);Wexham Park Hospital, Slough (Ram Moorthy, James Bates);William Harvey Hospital, Ashford (Joe Wasson, Anya Selwyn);Worcestershire Royal Hospital (Charles Daultrey, Sanjay Patel);Wythenshawe Hospital, Greater Manchester (Derrick Siau, Rupali Sawant);Ysbyty Gwynedd Hospital, Bangor (Phillip Moore, Faiza Ali)
