# Supplementary material for: Admission avoidance in tonsillitis and peritonsillar abscess: A prospective national audit during the initial peak of the COVID‐19 pandemic
Source: PubMed Central journal article supplement — Clin Otolaryngol. 2020 Dec 17;46(2):363–72. doi: 10.1111/coa.13680 (PMC7753410; doi:10.1111/coa.13680), 2020-12-17
Supplement: COA-46-363-s002.pdf [file COA-46-363-s002.pdf]

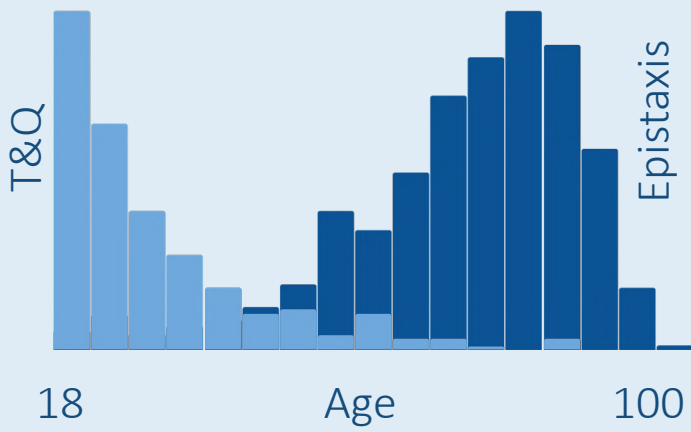

- First Interim report from the INTEGRATE COVID-19 Emergency Care Audit
- 898 cases over 4 weeks from 6<sup>th</sup> April to 4<sup>th</sup> May 2020
- 71 sites registered across England, Scotland, Wales & Northern Ireland [interim data from 58 sites]

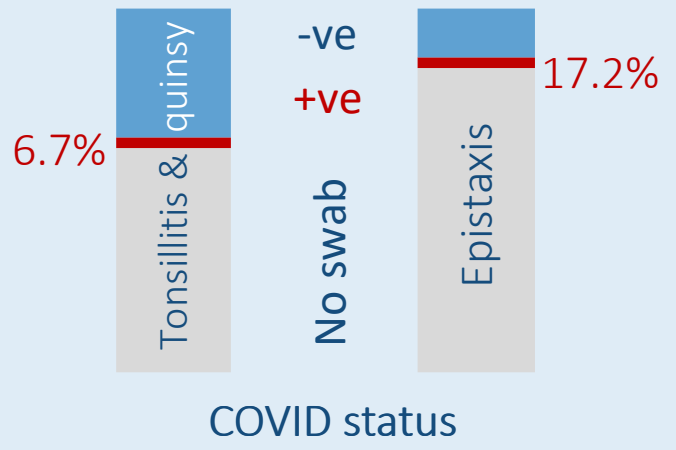

- 577 epistaxis cases; 2.7 per site per week
- 321 suspected tonsillitis/quinsies; 1.5 per site per week
- 84.3% suspected tonsillitis/quinsy still underwent oral exam
- Only 17.6% of epistaxis referrals received IV Tranexamic Acid
- 47% of epistaxis had been packed by ED prior to referral
- 38.8% of epistaxis had a dissolvable product used by ENT

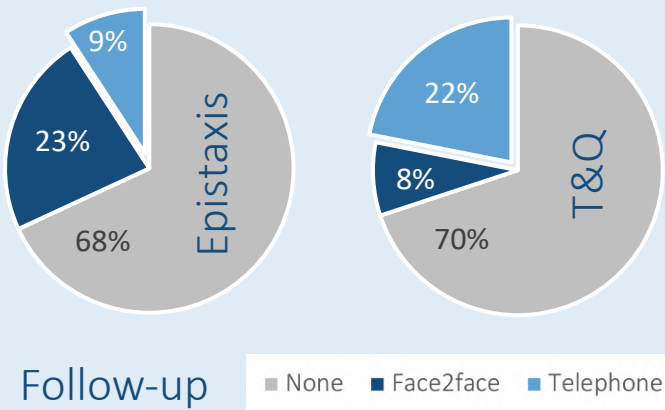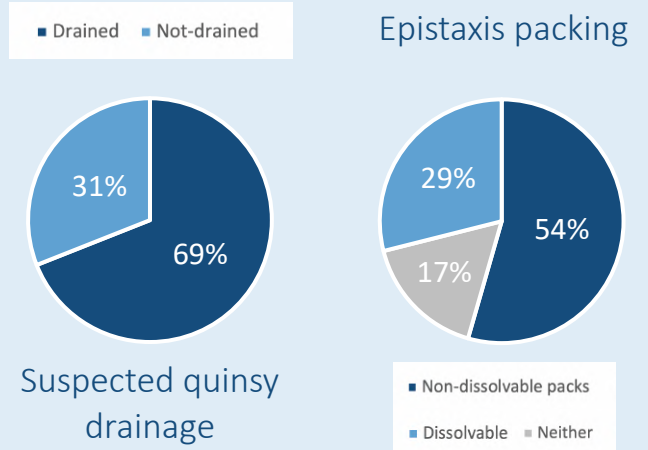

# INTEGRATE

The UK ENT Trainee Research Network

## Epistaxis Outpatient management

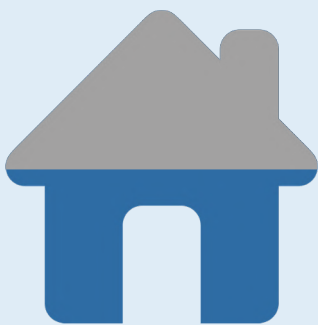

49.2% of PACKED epistaxis was managed at home

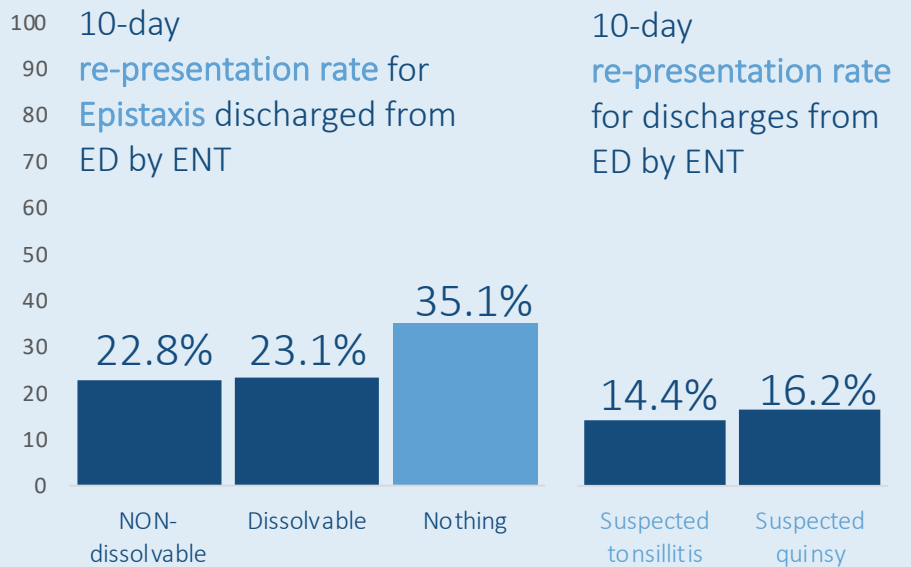

# INTEGRATE

## COVID-19

### Emergency Care

### Audit

Summary data available [here](#)

Registered site list available [here](#)

Thank you for everyone who is  
taking part

11<sup>th</sup> May 2020

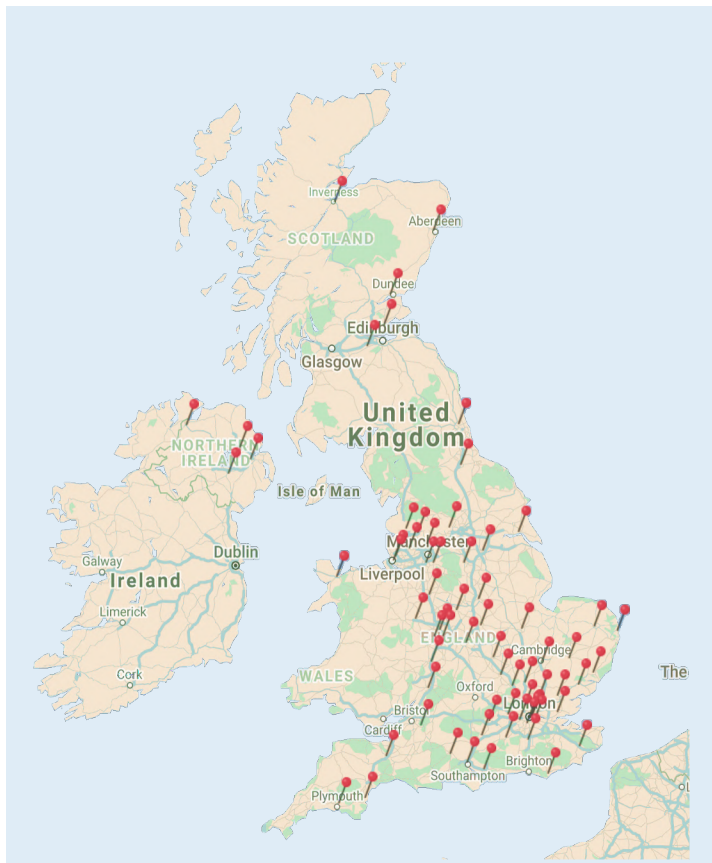

**Steering committee:** John Hardman, Matthew Smith, Chloe Swords, Huw Jones, Abi Walker, Rajeev Mathew, Ollie McLaren, Kris Hutson, John Rocke, Kristijonas Milinis, Anna Slovic, James Bryan

**Collaborators:** Aberdeen Royal Infirmary (Mr Muhammad Shakeel, Mr Anas Gomati); Addenbrooke's Hospital, Cambridge (Prof. Bance, James Bryan); Aintree University Hospital (Mr Lancaster, Natalie Maple); Altnagelvin Area Hospital (Ms C Smyth, Colm Dorris); Antrim Area Hospital (Andrew Kelly, David McCrory); Barnet Hospital, London (Yogesh Bhatt, Guled Jama); Basildon University Hospital (Montio Morgan, Victoria Perkins); Basingstoke and North Hampshire Hospital (Paul Spraggs, Shivun Khosla, Thomas Geyton); Birmingham City Hospital (Mr Yohanna Takwoingi, Mr Yohanna Takwoingi); Bradford Royal Infirmary (BRI) (David Strachan, Eugene Omakobia); Broomfield Hospital, Chelmsford (Mark Puvanendran, Tharsika Myuran, Matthew Egan); Colchester General Hospital (Mr Duncan McRae, Mr Omar Burgan); Craigavon Area Hospital (Mr Ekambar Reddy, Brendan Wright); Darlington Memorial Hospital (Naveed Kara, Ashleigh Ivy); Derriford Hospital, Plymouth (Mr. Richard Williams, Alex Walkden); Doncaster Royal Infirmary (Mr Quraishi, Nicola Stobbs); East Surrey Hospital, Redhill (Mr Sameer Khemani, Alison Liu); Eastbourne District General Hospital (Mr. Paul Kirkland, Rishi Vasanthan); Evelina London Children's Hospital (Victoria Possamai, Eishaan Kamta Bhargava); Fairfield General Hospital, Greater Manchester (Samit Ghosh, Kristina Lee); Freeman Hospital, Newcastle (Miss C McLaren, Mr Mark R Williams); Gloucestershire Royal Hospital (Okechukwu Okonkwo, Zahir Mughal); Guy's Hospital (Yakuba Karagama, Carol Xie); Hull Royal Infirmary (Mr P Jassar, Miss Han Cao); Ipswich Hospital (Sachin Patil, Chloe Swords); James Paget University Hospital, Great Yarmouth (Carl Philpott, Sheneen Meghji); Leicester Royal Infirmary (Sudip Das, Simon Cole); Lister Hospital, Stevenage (Mr Ananth Vijendren, Miss Munira Ally); Luton and Dunstable University Hospital (Kothari, Eyal Schechter); Manchester Royal Infirmary (MRI) (Mr Baskaran Ranganathan, Mr Rajeev Advani); Milton Keynes University Hospital (Adam Shakir, Darren Yap); Musgrove Park Hospital, Taunton (Edward Chisholm, Shilpa Ojha); Ninewells Hospital, Dundee (Mr Patrick Spielmann, Richard Steven); Norfolk and Norwich University Hospital (Stuart Burrows, Boeke van Beugen); Northampton General Hospital (Mrinal Supriya, Elizabeth Mathew); Peterborough City Hospital (Mr Ajmal Masood, Samuel Dewhurst); Princess Alexandra Hospital, Harlow (Ms Shalini Patiar, Zsofia Nemeth); Princess Royal, Telford (Mr Duncan Bowyer, Mr Ding Yang); Queen Alexandra Hospital, Portsmouth (Miss Eleanor Sproson, Erdinc Soyly); Queen's Hospital Burton (Azher Siddiq, Josh Whittaker); Queen's Medical Centre, Nottingham (QMC) (Mr Yujay Ramakrishnan, Wai Sum Cho); Raigmore Hospital, Inverness (Angus Cain, Fergus Cooper); Royal Albert Edward Infirmary, Wigan (Mr Steve Izzat, Mr Elliot Heward); Royal Berkshire Hospital, Reading (Mr Dilip Nair, Elizabeth Casselden, Shawn Tan); Royal Blackburn Hospital (Mr Anu Daudia, Jennifer Gilchrist); Royal Hallamshire Hospital, Sheffield (Prof Jaydip Ray, Beverley Yu); Royal Preston Hospital (Mr John DeCarpentier, Bhargavi Chandrasekar); Royal Stoke University Hospital (Mr S K Bhimrao, Michael Eastwood); Royal Surrey County Hospital, Guildford (Mr Sunkaraneni, Chang Woo Lee, Jamie Patel); Royal United Hospital, Bath (Thomas Mawby, Fenella Shelton); Royal Victoria Hospital, Belfast (Mr Ramzan Ullah, Robbie Stewart); Russells Hall Hospital, Dudley (Mr Mudit Jindal, Alexander Yao); Salisbury District Hospital (Mr Marcel Geyer, Emily Lowe); Southampton General Hospital (Huw Jones, Aria Amir Ghasemi); St George's Hospital, London (Sarah Little, Tiffany Munroe-Gray); St John's Hospital, Livingston (Alex Bennett, Lucy Li); Stepping Hill Hospital, Greater Manchester (Ms Mamoona Khalid-Raja, George McNally); The Royal Liverpool University Hospital (Ms Clare Williams, Matthew Zammit); The Royal London Hospital (Kay Seymour, Elinor Warner); Torbay Hospital (Chris Potter, Rachel Easto); University Hospital Coventry and Warwickshire (UHCW) (Mr Karamchandani, Charn Gill); University Hospital Lewisham, London (Irfan Syed, Abigail Walker); Victoria Hospital, Fife (David Walker, Kirsten Stewart); Walsall Manor Hospital (Mark Simmons, Ahmad K. Abou-Foul, Ravine Gill); West Middlesex University Hospital, London (Mr John Almeyda, Agamemnon Pericleous); West Suffolk Hospital, Bury St Edmunds (Fahmy Fahmy, Anna Kaleva); Wexham Park Hospital, Slough (Ram Moorthy, James Bates); William Harvey Hospital, Ashford (Joe Wasson, Anya Selwyn); Worcestershire Royal Hospital (Charles Daultrey, Sanjay Patel); Wythenshawe Hospital, Greater Manchester (Mr Derrick Siau, Ms Rupali Sawant); Ysbyty Gwynedd Hospital, Bangor (Phillip Moore, Faiza Ali);
